# Supplementary material for: Aromatisation of steroids in the bivalve Mytilus trossulus
Source: PeerJ. 2019 May 22;7:e6953. doi: 10.7717/peerj.6953 (PMC6535040; doi:10.7717/peerj.6953)
Supplement: Supplemental Information 3 [file peerj-07-6953-s003.xlsx]

## Sheet: temperature
DPM /1h/mg protein/1 ml
temperature gradient (oC)	4 GILLS	4 GONADS	5 GILLS	5 GONADS	6 GILLS	6 GONADS	7 GILLS	7 GONADS	8 GILLS	8 GONADS	9 GILLS	9 GONADS	10 GILLS	10 GONADS	11 GILLS	11 GONADS	18 GILLS	18 GONADS	23 GILLS	23 GONADS
	402.62	73.64	186.72	247.14	805.69	590.33	400.63	449.46	2401.51	3022.53	1969.72	1636.86	983.795	1474.65	522.51	738.8	478.37	173.87	252.62	417.94
	398.63	83.36	192.77	248.04	825.71	605.29	652.01	631.97	2501.18	3207.61	2032.98	1721.22	982.27	1540.04	531.06	219.9	452.31	174.8	265.46	66.21
	100.16	33.98	200.66	251.64	1101.32	781.19	686.17	677.24	3584.71	4675.28	2026.45	955.54	1045.88	809.975	482.58	536.06	258.5	210.31	102.61	512.28
	110.28	38.75	201.18	261.32	1122.39	819.34	1204.56	690.68	3789.97	4745.21	1889.78	932.67	1072.73	808.94	477.24	539.89	258.42	211.48	92.52	537.36
					963.77	699.03	1265.74	707.49	1127.7	1092.34
					573.31	620.72	1991.58	560.72	1142.56	1225.79
					555.44	619.25	1990.58	543.17	1161.79	2370.33
					536.22	600.2		2823.11	1229.17	2321.82
					586.08	588.28		2918.6	1949.86	2329.48
								3964.94	1831.23	2447.86
								3969.05	1905.44	2341.64
									1957.41	2242.73
									1626.64	3261.85
									1737.78	3469.25
									2414.48	3613.38
									2455.53	4322.43
									2672.42	5335.64
									2844.43	2817.14
									1604.96
									3548.96
MEAN	252.923	57.4325	195.333	252.035	785.548	658.181	1170.18	1630.58	2174.39	3046.8	1979.73	1311.57	1021.17	1158.4	503.348	508.662	361.9	192.615	178.303	383.447
dilution 3x	758.768	172.298	585.998	756.105	2356.64	1974.54	3510.54	4891.75	6523.16	9140.39	5939.2	3934.72	3063.51	3475.2	1510.04	1525.99	1085.7	577.845	534.908	1150.34
