# Supplementary material for: Aromatisation of steroids in the bivalve Mytilus trossulus
Source: PeerJ. 2019 May 22;7:e6953. doi: 10.7717/peerj.6953 (PMC6535040; doi:10.7717/peerj.6953)
Supplement: Supplemental Information 5 [file peerj-07-6953-s005.xlsx]

## Sheet: sesonal
DPM/1h/mg protein/1ml
	spring	spring	summer	summer	autumn	autumn	winter	winter
	GILLS	GONADS	GILLS	GONADS	GILLS	GONADS	GILLS	GONADS
	1136.26	1808.34	918.19	900.31	640.32	766.59	111.09	97.59
	1224.5	1865.82	910.78	932.76	655.37	788.45	109.34	94.96
	2019.76	1668.04	602.46	694.2	698.04	79.8	224.34
	1833.04	1697.44	630.38	751.6	727.63	40.93	217.02
	1145.37	2362.71
	1203.31	2439.51
	2323.9	2220.12
	2405.48	2261.76
