# Supplementary material for: Aromatisation of steroids in the bivalve Mytilus trossulus
Source: PeerJ. 2019 May 22;7:e6953. doi: 10.7717/peerj.6953 (PMC6535040; doi:10.7717/peerj.6953)
Supplement: Supplemental Information 6 [file peerj-07-6953-s006.xlsx]

## Sheet: sex
DPM/1h/1 ml/mg protein	microsomes gills	microsomes gonads	mitochondria gills	mitochondria gonads
FEMALES	1808.95	2363.32	2069.54	3704.49
	1866.43	2440.12	2210.59	3833.01
	1668.65	2220.73	2380.12	3892.43
	1698.05	2262.37	2343.5	4007.4
MALES	1136.87	1145.98	3512.52	2838.62
	1225.11	1203.92	3645.25	3008.46
	2020.37	2324.51	2960.62	3060.97
	1833.65	2406.09	3029.96	2932.62
